# Supplementary material
Source: PubMed Central journal article supplement (PMC6294301)
Supplement: NIHMS1512891-supplement-1.pdf [file NIHMS1512891-supplement-1.pdf]

**Table S1 related to Figure 1.** Demographic and clinical characteristics of the study cohort.

|                                                     | <b>CDK4/6i + AI<br/>n = 216</b> | <b>CDK4/6i + SERD<br/>n = 132</b> |
|-----------------------------------------------------|---------------------------------|-----------------------------------|
| <b>Age at diagnosis</b>                             |                                 |                                   |
| <40                                                 | 54 (25.0%)                      | 25 (18.9%)                        |
| 40-49                                               | 50 (23.1%)                      | 42 (31.8%)                        |
| 50-59                                               | 67 (31.0%)                      | 44 (33.3%)                        |
| ≥60                                                 | 45 (20.8%)                      | 21 (15.9%)                        |
| <b>Stage at diagnosis</b>                           |                                 |                                   |
| Stage I                                             | 34 (15.7%)                      | 17 (12.9%)                        |
| Stage II                                            | 55 (25.5%)                      | 47 (35.6%)                        |
| Stage III                                           | 52 (24.1%)                      | 36 (27.3%)                        |
| Stage IV                                            | 73 (33.8%)                      | 32 (24.2%)                        |
| Not available                                       | 2 (0.9%)                        | 0                                 |
| <b>Histology</b>                                    |                                 |                                   |
| Invasive ductal                                     | 149 (69.0%)                     | 99 (75.0%)                        |
| Invasive lobular                                    | 48 (22.2%)                      | 24 (18.2%)                        |
| Mixed ductal/lobular                                | 13 (6.0%)                       | 8 (6.1%)                          |
| Carcinoma NOS or other                              | 6 (2.8%)                        | 1 (0.8%)                          |
| <b>Histologic grade (primary tumor)</b>             |                                 |                                   |
| I-Well differentiated                               | 4 (1.9%)                        | 6 (4.5%)                          |
| II-Moderately differentiated                        | 42 (19.4%)                      | 26 (19.7%)                        |
| III-Poorly differentiated                           | 134 (62.0%)                     | 77 (58.3%)                        |
| Not available                                       | 36 (16.7%)                      | 23 (17.4%)                        |
| <b>Menopausal status at diagnosis</b>               |                                 |                                   |
| Pre                                                 | 97 (44.9%)                      | 65 (49.2%)                        |
| Peri                                                | 15 (6.9%)                       | 6 (4.5%)                          |
| Post                                                | 103 (47.7%)                     | 60 (45.5%)                        |
| Not applicable (male%)                              | 0                               | 1 (0.8%)                          |
| Not available                                       | 1 (0.5%)                        | 0                                 |
| <b>Prior lines of therapy in metastatic setting</b> |                                 |                                   |
| Median (range)                                      | 1 (0, 16)                       | 2 (0, 11)                         |
| <b>Sequenced sample type</b>                        |                                 |                                   |
| Primary                                             | 59 (27.3%)                      | 33 (25.0%)                        |
| Metastasis                                          | 157 (72.7%)                     | 99 (75.0%)                        |

Abbreviations. CDK4/6i: CDK4/6 inhibitor, AI: aromatase inhibitor, SERD: selective estrogen degrader

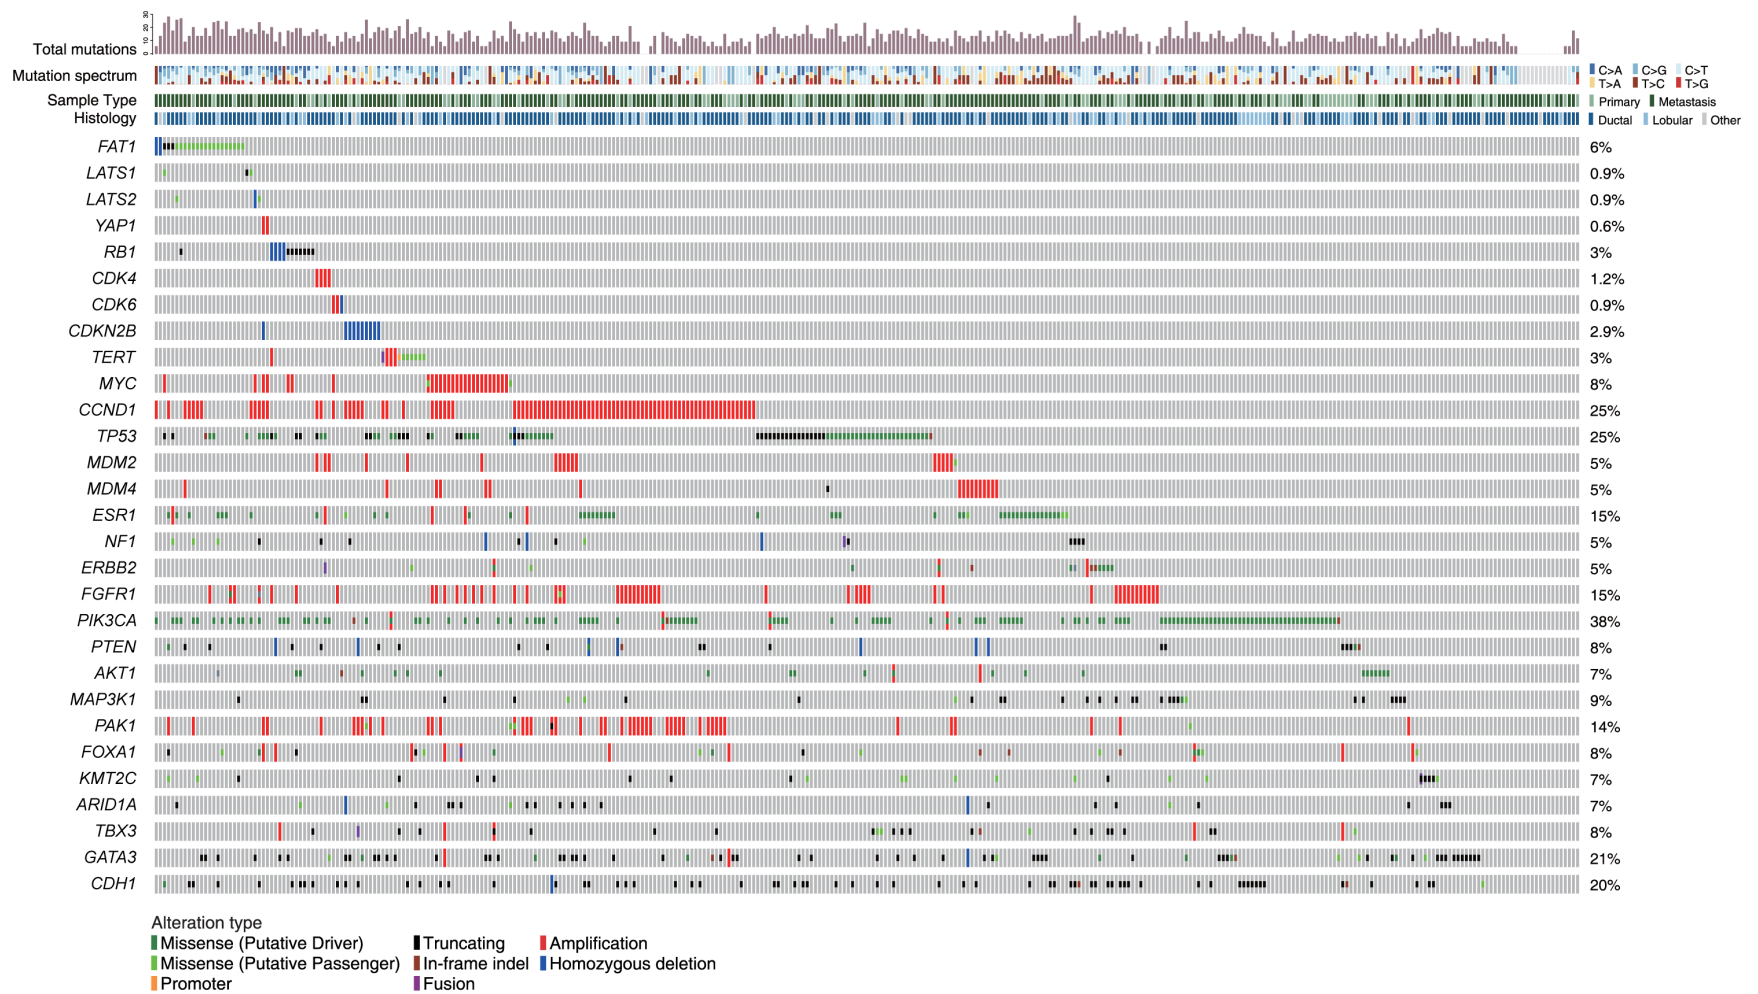

**Figure S1, related to Figure 1. Pattern, frequency, and type of genomic alterations in key breast cancer genes in 348 patients who underwent genomic profiling of the tumor using prior to start of CDK4/6i therapy.**

Bars represent somatic non-synonymous mutation rate for the samples.

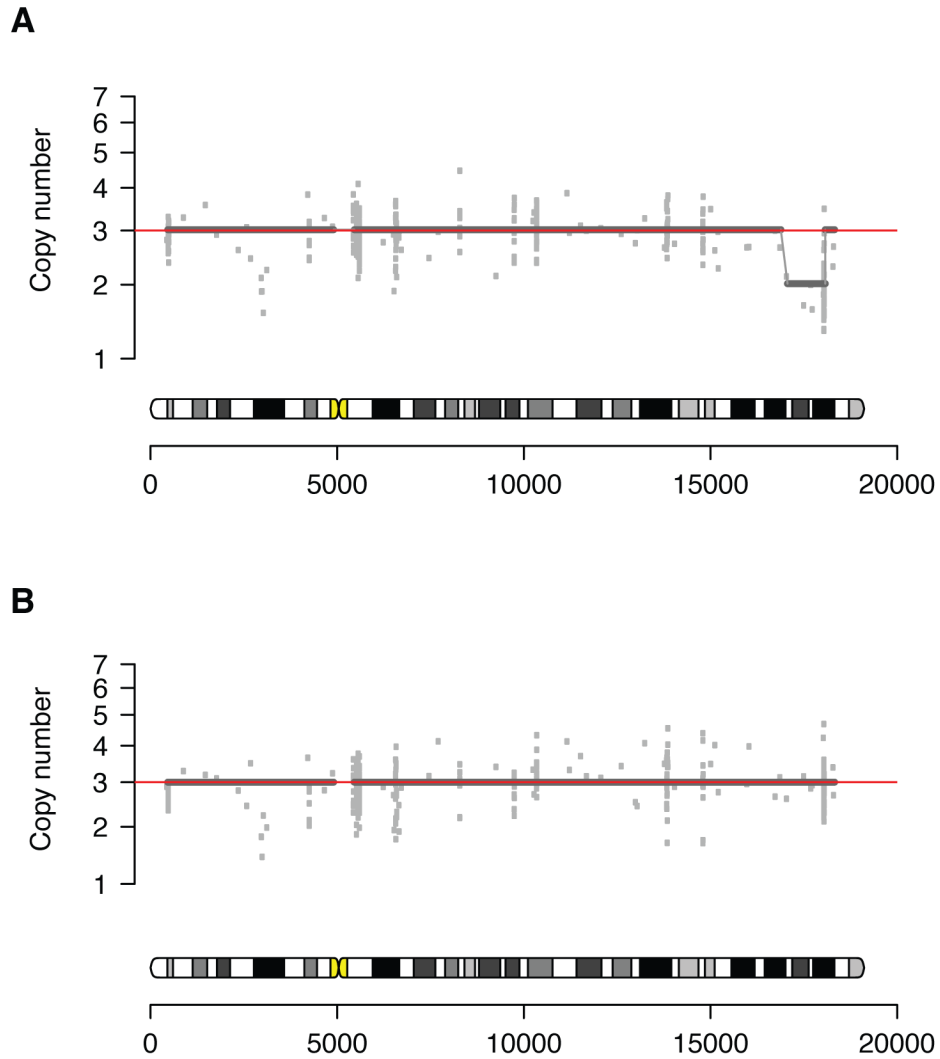

**Figure S2 related to Figure 2. Estimated integer copy numbers of chromosome 4 for pre- and post-treatment tumors.**

(A, B) Estimated integer copy numbers of chromosome 4 for the biopsies of the post-treatment liver metastasis of the patient with *ADAM29-FAT1* fusion (A) and the pre-treatment lung metastasis (B) presented in Figures 2D-2F. The post-treatment sample shows a copy number deletion of 4q35.2 involving *FAT1*.

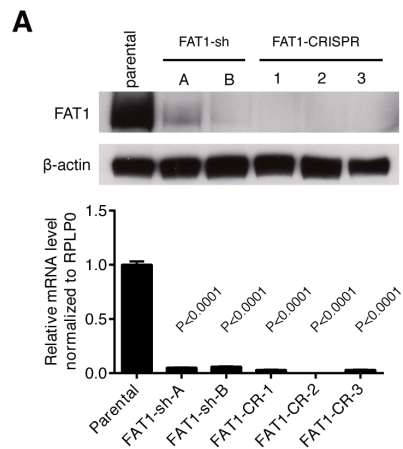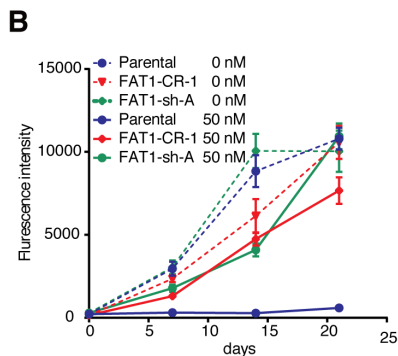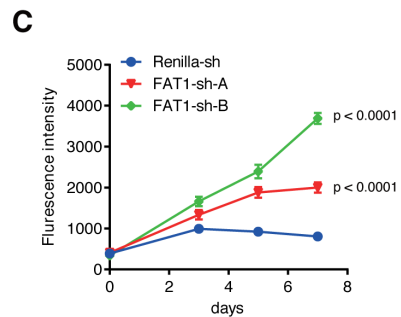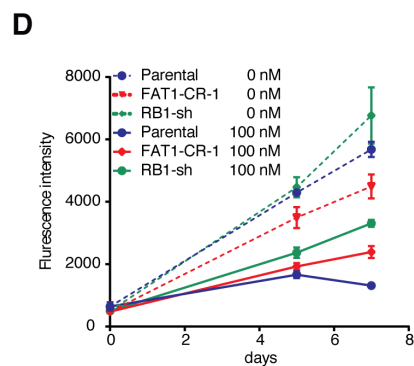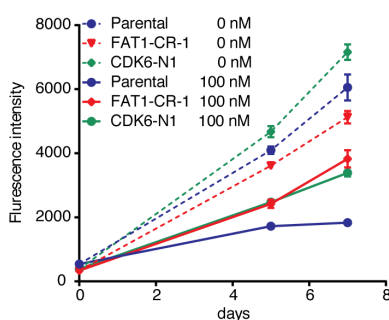

| IC <sub>50</sub> (nM) | Parental | FAT1-CR-1 | RB1-sh |
|-----------------------|----------|-----------|--------|
|                       | 52.25    | 187.6     | 178.2  |

| IC <sub>50</sub> (nM) | Parental | FAT1-CR-1 | CDK6-N1 |
|-----------------------|----------|-----------|---------|
|                       | 52.44    | 211.1     | 146.6   |

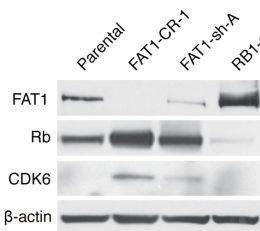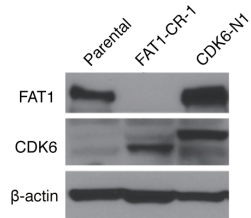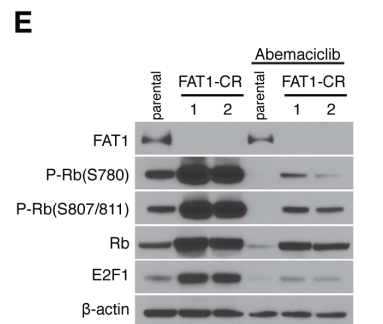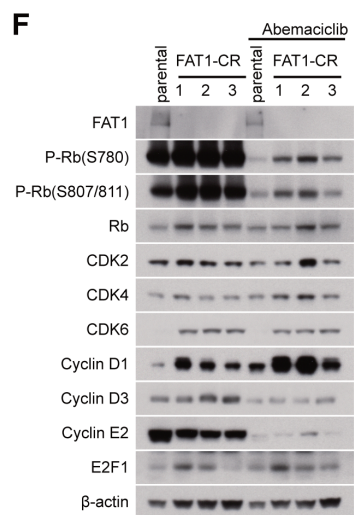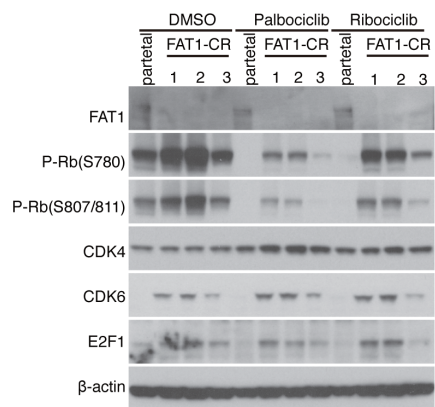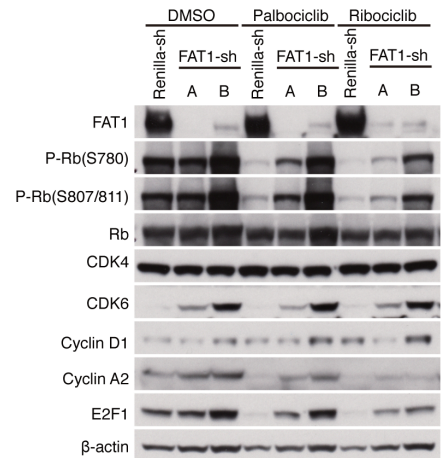

**Figure S3, related to Figure 3. *FAT1* loss induces CDK6 expression and CDK4/6 inhibitor resistance in breast cancer cells.**

(A) mRNA and protein level of *FAT1* in MCF7 *FAT1* loss models. Data are represented as mean  $\pm$  SD; n = 3. All p values are based on one-way ANOVA test with Dunnett's method correction, compared with parental. (B) Proliferation of *FAT1*-loss and parental MCF7 cells with or without 50 nM of abemaciclib treatment reveals resistance of *FAT1* suppressed models. Data are represented as mean  $\pm$  SD; n = 2. (C) Cell growth rate of *FAT1*-sh, *FAT1*-CR, Renilla-sh and parental MCF7 cells exposed to 100 nM of abemaciclib. Data are represented as mean  $\pm$  SD; n = 2. All p values are based on one-way ANOVA statistical test of day 5 data with Dunnett's method correction compared with parental or Renilla-sh. (D) Expression of indicated proteins in parental, *FAT1*-loss, RB1 knockdown or CDK6-overexpression MCF7 cells and proliferation of these cells with or without 100 nM of abemaciclib treatment. IC<sub>50</sub>s were calculated based on day 5 data of various doses of drug treatment. Data are represented as mean  $\pm$  SD; n = 2. (E) Phospho-Rb levels and expression of indicated proteins in parental and *FAT1*-CR CAMA-1 cells treated with or without 100 nM of abemaciclib for 24 hours. (F) Phospho-Rb and expression of indicated proteins in *FAT1*-CR, *FAT1*-sh, Renilla-sh and parental MCF7 cells treated with or without 100 nM of abemaciclib, palbociclib or ribociclib for 24 hours.

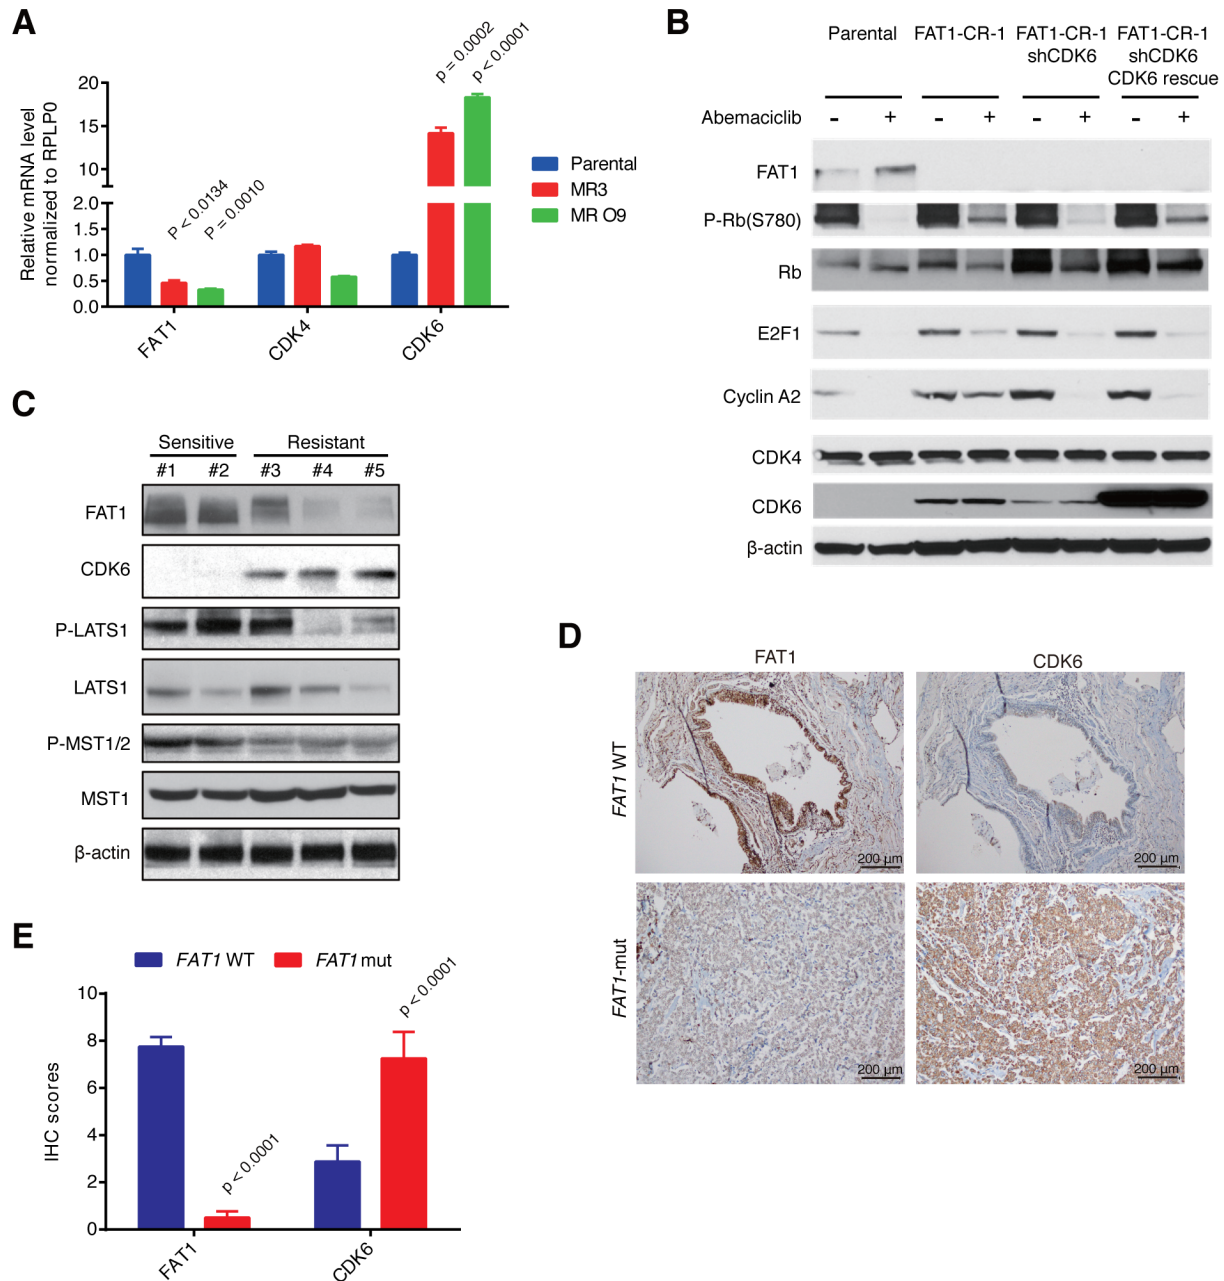

**Figure S4, related to Figure 4. The expression of CDK6 is associated with drug sensitivity.**

(A) Relative mRNA expression of *FAT1*, *CDK4* and *CDK6* were normalized to *RPLP0* in MR3 and MR O9 cells. Data are represented as mean  $\pm$  SD, n=2. All p values are based on one-way ANOVA test with Dunnett's method correction compared with parental. (B) Phospho-Rb levels and protein expression of indicated genes in parental and *FAT1*-loss MCF7 cells constitutively

expressing CDK6-shRNA, or CDK6-shRNA plus CDK6 overexpression. Cells were treated with or without 100 nM of abemaciclib for 24 hours after 48 hours of transfection. **(C)** Immunoblotting of indicated proteins in PDXs treated with ribociclib for 9 weeks reveals significantly lower FAT1 and higher CDK6 expression as well as decreased phosphorylation of Hippo pathway proteins in resistant PDXs compared to sensitive PDXs. **(D)** Immunohistochemical (IHC) images of human breast tumors with different *FAT1* alterations stained with FAT1 or CDK6 antibodies. Scale bars, 200  $\mu$ m. **(E)** Quantification of FAT1 and CDK6 staining in IHC images of human breast cancers (8 *FAT1* wild-type vs. 8 *FAT1* genomically altered) by a pathologist blinded to the genomic status of the cancers reveals tumors with low FAT1 expression have elevated CDK6 levels. Data are represented as mean + SD. All p values are based on two-tailed unpaired Student's t-tests.

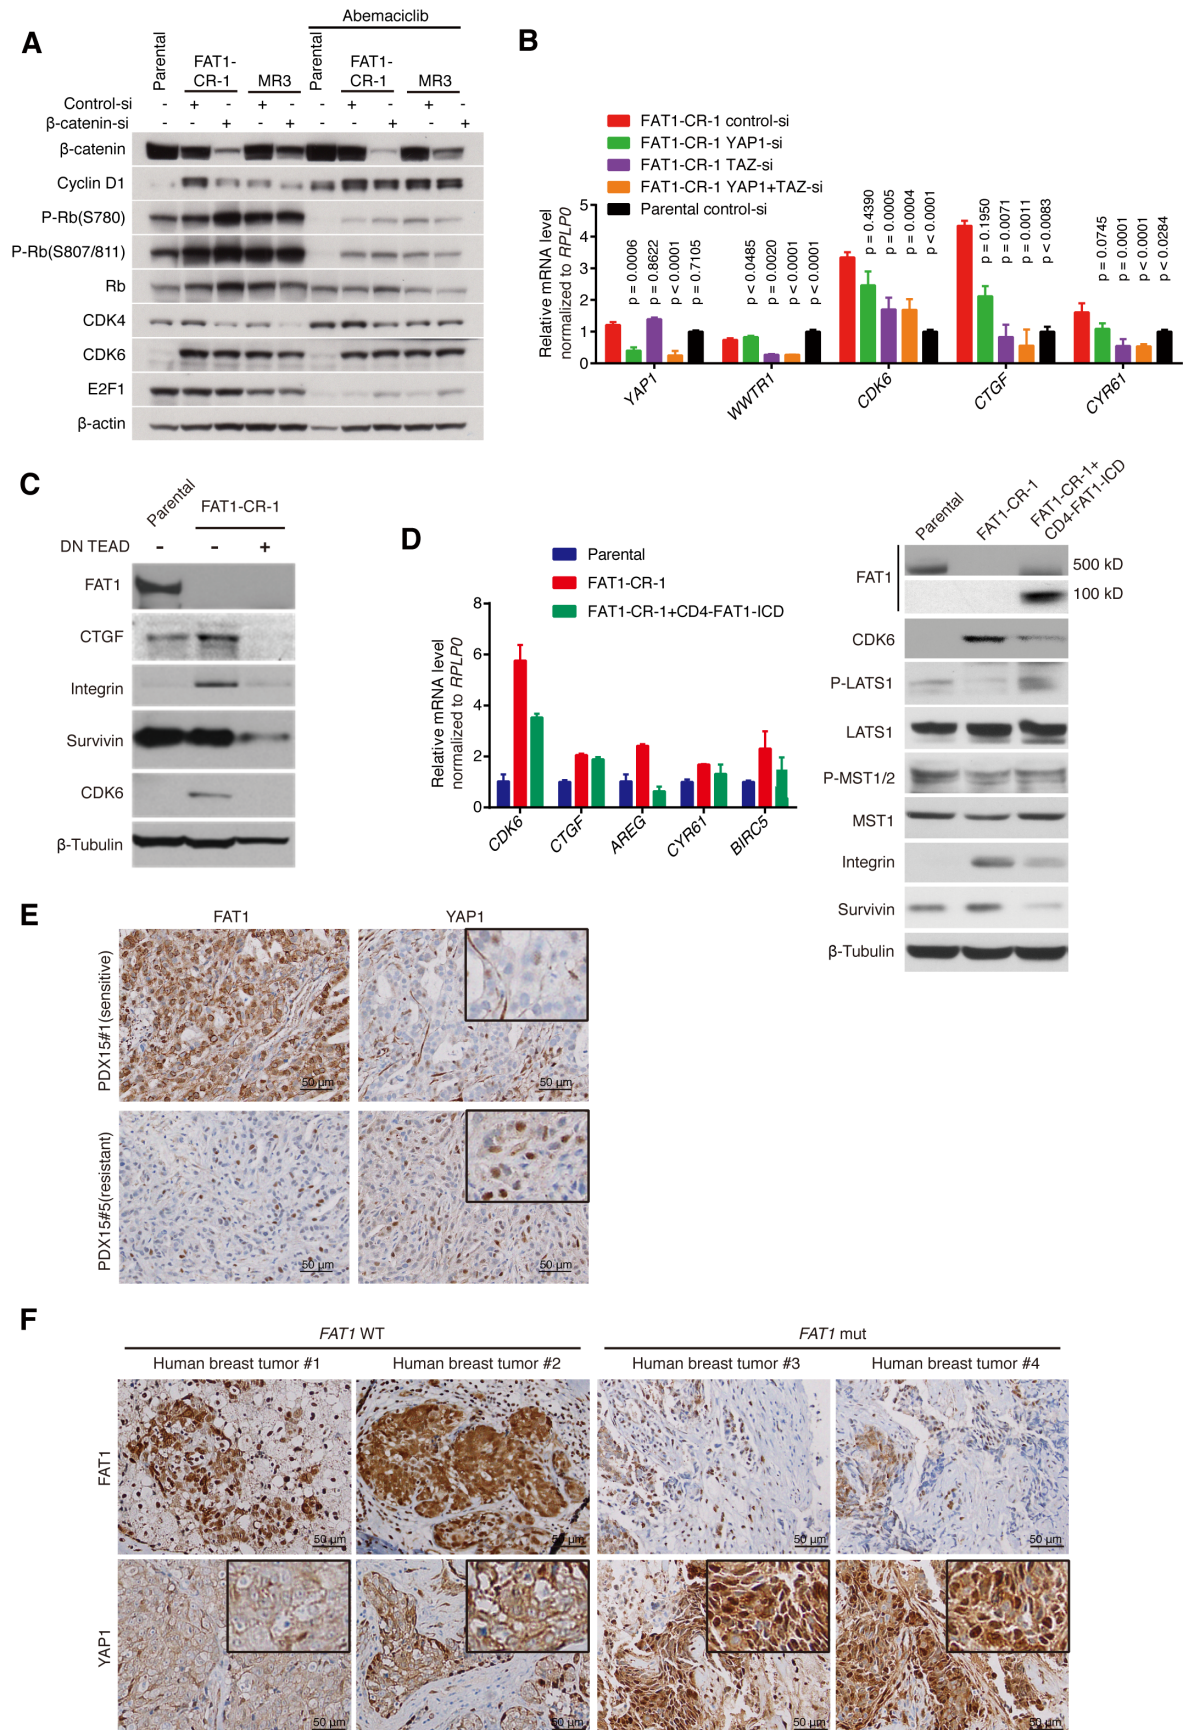



**Figure S5, related to Figure 5. YAP and TAZ, but not  $\beta$ -catenin, are required for the induction of CDK6**

(A) Phospho-Rb and expression of indicated proteins in parental and *FAT1* ablation cells with CTNNB1 knockdown. Cells were treated with or without 100 nM of abemaciclib for 24 hours after 48 hours of transfection. (B) Relative mRNA expression of indicated genes normalized to *RPLP0* in *FAT1*-CR and parental MCF7 cells transfected with indicated siRNAs against YAP/TAZ showing *FAT1* loss-mediated induction of CDK6 is YAP/TAZ dependent. Data are represented as mean  $\pm$  SD, n=3. p values (One-way ANOVA statistical test with Dunnett's method correction, compared with *FAT1*-CR-1 control-si) were calculated. (C) Protein expression of indicated proteins in parental and *FAT1* ablation cells with dominant negative (DN) TEAD overexpression. (D) Protein expression and relative mRNA expression of indicated genes in parental MCF7 cells, *FAT1*-CR cells and *FAT1*-CR cells overexpressing CD4-*FAT1*-ICD reveals *FAT1* expression suppresses the transcription of CDK6 and Hippo targets. Data are represented as mean  $\pm$  SD, n=2. (E) Immunohistochemical (IHC) images of PDX samples with different sensitivity to CDK4/6 inhibitors stained with *FAT1* and YAP1 antibodies reveal increased YAP1 nuclear localization in *FAT1*-low (resistant) PDX samples. Scale bars 50  $\mu$ m. A zoom in area of YAP1 staining showed on the up-right corner. (F) Immunohistochemical (IHC) images of human breast tumors stained with *FAT1* or YAP1 antibodies reveal increased YAP1 nuclear localization in *FAT1*-low samples. Scale bars 100  $\mu$ m. A zoom in area of YAP1 staining showed on the up-right corner. (8 *FAT1* wild-type vs. 8 *FAT1* genomically altered)

**Table S5, related to Figure 5.** RNA sequencing result of parental MCF7 and *FAT1* knockout cells. Some cell cycle related genes are listed below.

| <b>ID</b>    | <b>Fold change</b> | <b>Adjusted p value</b> | <b>MCF-7_1</b> | <b>MCF-7_2</b> | <b>FAT1 CR_1</b> | <b>FAT1 CR_2</b> |
|--------------|--------------------|-------------------------|----------------|----------------|------------------|------------------|
| <i>CDK6</i>  | 2.91               | 1.02e-56                | 112.13         | 99.08          | 762.79           | 824.16           |
| <i>FAT1</i>  | -4.89              | 6.31e-29                | 1189.91        | 748.99         | 36.99            | 28.34            |
| <i>CTGF</i>  | 2.49               | 3.21e-02                | 2.90           | 3.64           | 21.99            | 14.74            |
| <i>CCNA2</i> | 1.67               | 5.56e-12                | 1547.56        | 1517.07        | 2487.32          | 2640.26          |
| <i>CCND1</i> | 1.38               | 6.77e-08                | 16492.48       | 15689.72       | 22391.92         | 22116.28         |
| <i>CCND3</i> | 0.68               | 0.0001                  | 1079.72        | 958.96         | 715.81           | 663.18           |
| <i>CCNE1</i> | 1.06               | 0.82                    | 213.62         | 221.79         | 224.94           | 234.66           |
| <i>CCNE2</i> | 1.23               | 0.05                    | 845.79         | 907.15         | 1018.72          | 1137.05          |
